# Supplementary material
Source: publisher figshare collection journal article supplement (https://acs.figshare.com/ndownloader/files/3970561)
Supplement: Supplementary file 1 [file 3970561]

# Modification of the Adhesive Properties of Silicone based-Coatings by Block Copolymers

*T.Chinh Ngo<sup>†</sup>, Radostina Kalinova<sup>‡</sup>, Damien Cossement<sup>&</sup>, Elise Hennebert<sup>§</sup>,  
Rosica Mincheva<sup>‡</sup>, Rony Snyders<sup>#</sup>, Patrick Flammang<sup>§</sup>, Philippe Dubois<sup>‡</sup>,  
Roberto Lazzaroni<sup>†</sup>, Philippe Leclère<sup>\*,†</sup>*

## Supporting Information

### Supplementary Figure 1

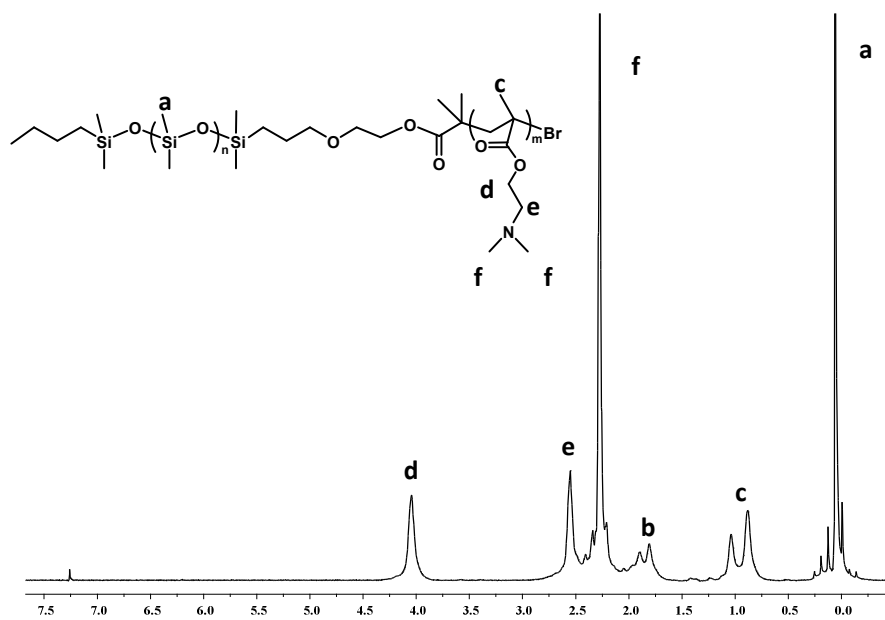

**Figure S1.** <sup>1</sup>H NMR of PDMS-*b*-PDMAEMA block copolymer (in CDCl<sub>3</sub>)

## Supplementary Figure 2

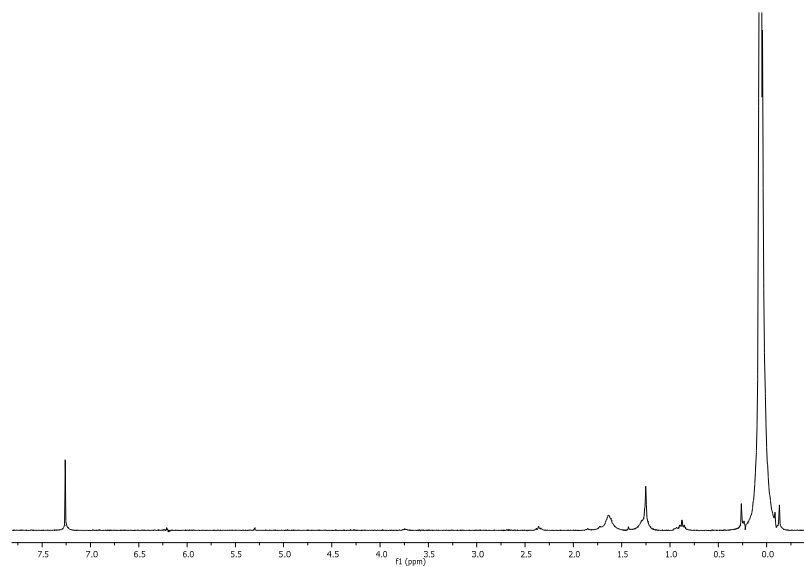

**Figure S2.**  $^1\text{H}$  NMR of the residue after leaching experiments (in  $\text{CDCl}_3$ )

### Supplementary Figure 3

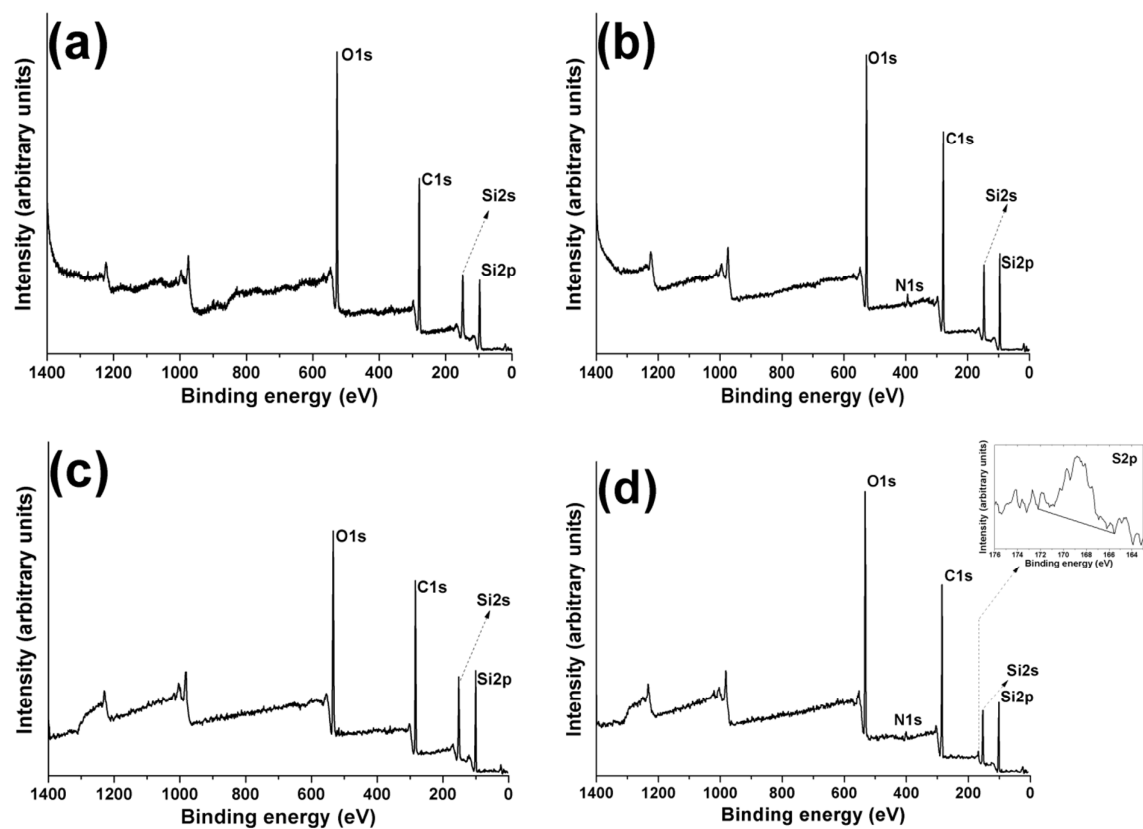

**Figure S3:** XPS Survey spectra of 10% PDMS-*b*-PDMAEMA filled silicone coatings (a) before; (b) after immersion and of 10% PDMS<sub>135</sub>-*b*-PDMAEMA<sub>116</sub>(SO<sub>3</sub><sup>-</sup>) filled silicone coatings (c) before; (d) after immersion.
